# Supplementary material
Source: MDPI journal article supplement (https://www.mdpi.com/2504-3900/1/6/670)
Supplement: s1 [file s1]

# Lipid-Oligonucleotide Conjugates Forming G-Quadruplex (Lipoquads) as Potent Inhibitors of HIV Entry

Sébastien Lyonnais<sup>1\*</sup>, Santiago Grijalvo<sup>2</sup>, Carmen Alvarez-Fernández<sup>1</sup>, Erik Fleta<sup>3</sup>, Javier Martínez<sup>3</sup>, Tula Ester Saison-Behmoaras<sup>4</sup>, Sonsoles Sánchez-Palomino<sup>1</sup>, Andreas Meyerhans<sup>3</sup>, Gilles Mirambeau<sup>1</sup> and Ramon Eritja<sup>2</sup>

<sup>1</sup>AIDS Research Group, IDIBAPS, Vil·loroel, 170, Barcelona, Spain - <sup>2</sup>IQAC-CSIC, CIBER-BBN, Jordi Girona 18-26, 08034 Barcelona, Spain - <sup>3</sup>Universitat Pompeu Fabra, Address, Barcelona, Spain - <sup>4</sup>Muséum National d'Histoire Naturelle, INSERM U1154, CNRS, UMR 7196, Paris, France  
\*Correspondence to: sebastien.lyonnais@gmail.com

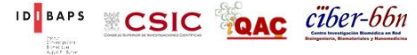

## OVERVIEW

Molecules that block virus entry by interfering with the actions of the viral fusion proteins are of primary concern in the search of antiviral drugs. We present here the synthesis and the antiviral activities of lipid-oligonucleotide conjugates (Lipoquads) forming a highly stable tetramolecular parallel G-quadruplex. We show that these molecules block HIV-1 and HIV-2 entry with submicromolar activities, demonstrating the great advantage of targeting both viral Envelope glycoprotein and lipids rafts, key platform in virus entry.

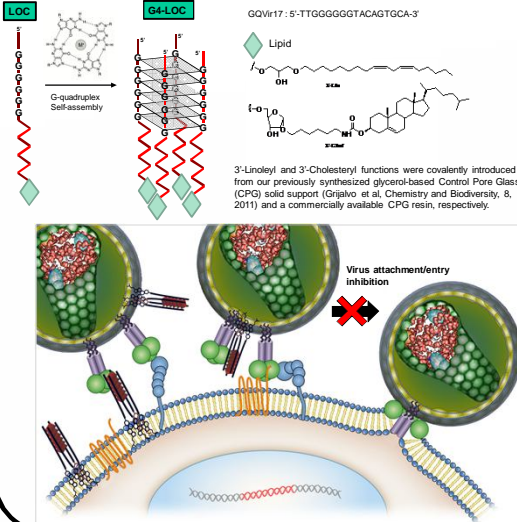

| Name         | Sequence 5'-3'         | G-Quadruplex            |
|--------------|------------------------|-------------------------|
| Seq17        | TTGGAAAGTACAGTGCA      | No (control)            |
| Seq17-lino   | TTGGAAAGTACAGTGCA-lino | No (control)            |
| GQvir17      | TTGGGGGTACAGTGCA       | Tetramolecular parallel |
| GQvir17-lino | TTGGGGGTACAGTGCA-lino  | Tetramolecular parallel |
| GQvir17-Chol | TTGGGGGTACAGTGCA-chole | Tetramolecular parallel |

## Native PAGE separation and circular dichroism assess G4 formation

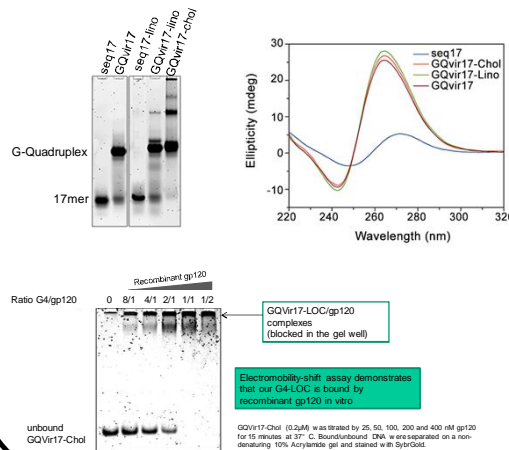

## The G4-LOC are highly stable molecules

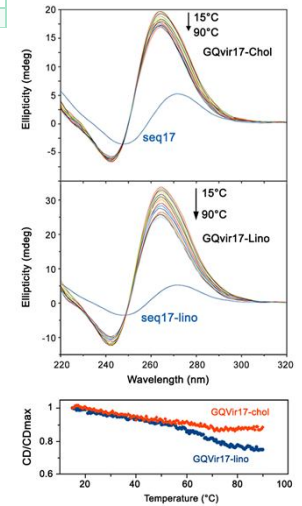

## G4-LOC are potent inhibitors of HIV-1 in cell cultures

|               | IC50 viral infectivity (nM) |           |           |
|---------------|-----------------------------|-----------|-----------|
|               | HIV-1 NL4-3                 | HIV-1 Lai | HIV-2 Rod |
| Seq17         | NA                          | NA        |           |
| Seq17-lino    | >40000                      | 37000     |           |
| GQvir17       | 1100 ± 80                   | 2360 ± 64 |           |
| GQvir17-lino  | 90 ± 20                     | 375 ± 27  | 1180 ± 30 |
| GQvir17-chole | 50 ± 18                     | 106 ± 15  |           |

The infectivity assay of HIV NL4-3 was performed by infecting SupT1 cells with the NL4-3REN vector in presence of test compounds. HIV replication was evaluated 72 hours post-infection following Renilla Luciferase fluorescence. For HIV Lai and HIV Rod, TZM-bl cells were incubated for 1 h with increasing concentrations of test compounds and next cells were infected with viruses and 48 h after infection cells were assayed for Tat-dependent, luciferase expression.

## G4-LOC neutralize HIV-1 particles

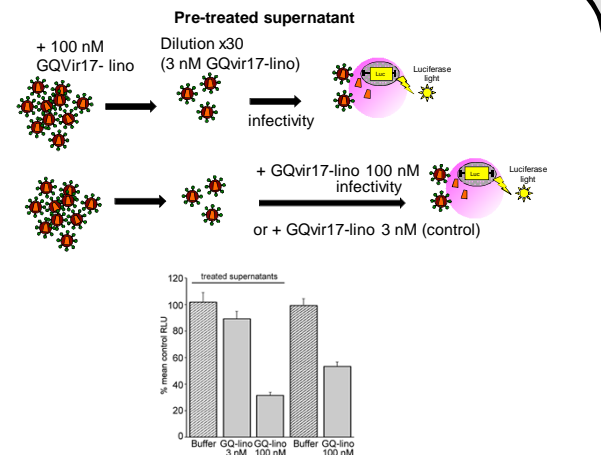

Recombinant NL4.3-ren supernatants were incubated with 100nM of GQvir17-lino for 3h and next diluted 30 times to infect SupT1 cells, which therefore diluted the compounds below EC50 levels (e.g. 3nM). SupT1 cells were infected in parallel with the dilution control (3nM) and direct inhibition of infection was performed as a positive control with 100nM of G4-LOC. This assay produced 50% of neutralized viruses when incubated with the compounds, suggesting their direct and persistent binding to the virus.

## The G4-LOC do neither target virus assembly nor virus production

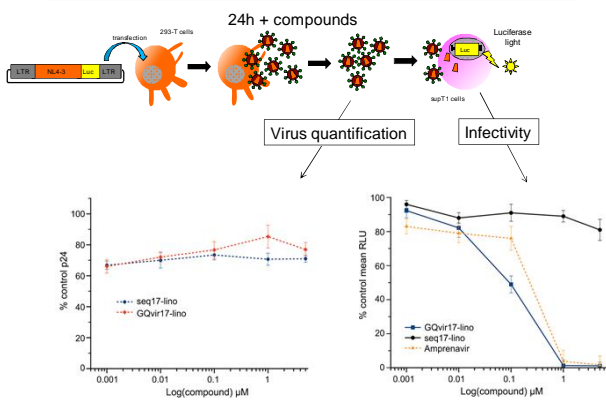

## G4-LOC are entry inhibitors

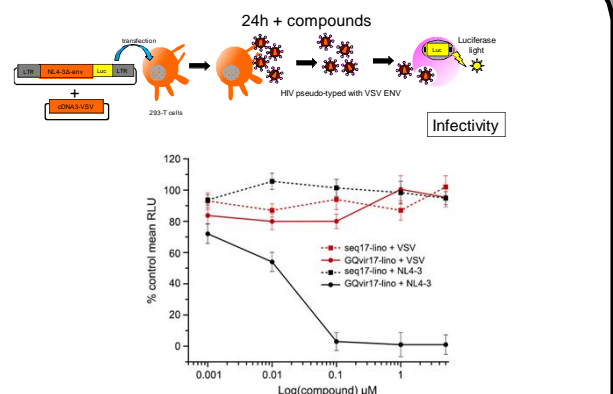

Viral entry inhibition is demonstrated by infecting SupT1 cells with HIV recombinant virus pseudo-typed with the G protein of VSV (NL4.3-Δenv-VSV-Luc), which enters host cells independently of cell receptors. VSV-pseudo-typed virus infection was not affected by the presence of neither GQvir17-lino nor the control seq17-lino, while 100 nM of GQvir17-lino inhibited HIV NL4.3 infection with an efficiency of around 70%.

## Cy5-G4-LOC bind to plasma membranes

HeLa cells treated 4h with 1µM of Cy5-GQvir17-Lino show plasma membrane-associated fluorescence

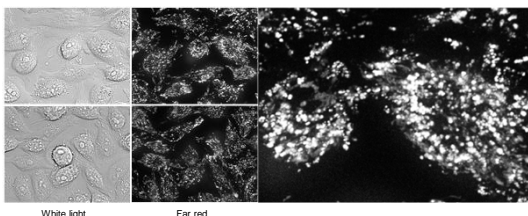

Our G4-LOC do not affect HeLa cells viability at 20µM, as also seen with TZB-bl, SupT1, ACH-2 and 293T cells
